# Supplementary material for: Polypyrrole–methylene blue nanoparticles as a single multifunctional nanoplatform for near-infrared photo-induced therapy and photoacoustic imaging
Source: Royal Society of Chemistry journal article supplement (doi:10.1039/c7ra02140b), 2017-01-01
Supplement: c7ra02140b1.pdf [file c7ra02140b1.pdf]

# **Polypyrrole-Methylene Blue Nanoparticles as a Single Multifunctional Nanoplatfom for Near-Infrared Photo-induced Therapy and Photoacoustic Imaging**

by

Thi Tuong Vy Phan,<sup>a,c</sup> Subramaniyan Bharathiraja,<sup>a</sup> Van Tu Nguyen,<sup>a,c</sup> Madhappan Santha Moorthy,<sup>a</sup>  
Panchanathan Manivasagan,<sup>a</sup> Kang Dae Lee,<sup>d</sup> and Junghwan Oh,<sup>a,b,\*</sup>

<sup>a</sup>Marine-Integrated Bionics Research Center, Pukyong National University, Busan 48513, Republic of Korea.

<sup>b</sup>Department of Biomedical Engineering and Center for Marine-Integrated Biotechnology (BK21 Plus), Pukyong National University, Busan 48513, Republic of Korea.

<sup>c</sup>Interdisciplinary Program of Biomedical Mechanical & Electrical Engineering, Pukyong National University, Busan 48513, Republic of Korea.

<sup>d</sup>Department of Otolaryngology – Head and Neck Surgery, Kosin University College of Medicine, Busan 48513, Republic of Korea

\*The corresponding author

Email: [jungoh@pknu.ac.kr](mailto:jungoh@pknu.ac.kr)

Fax: (82)51-629-5779

Office phone: (82)51-629-5771

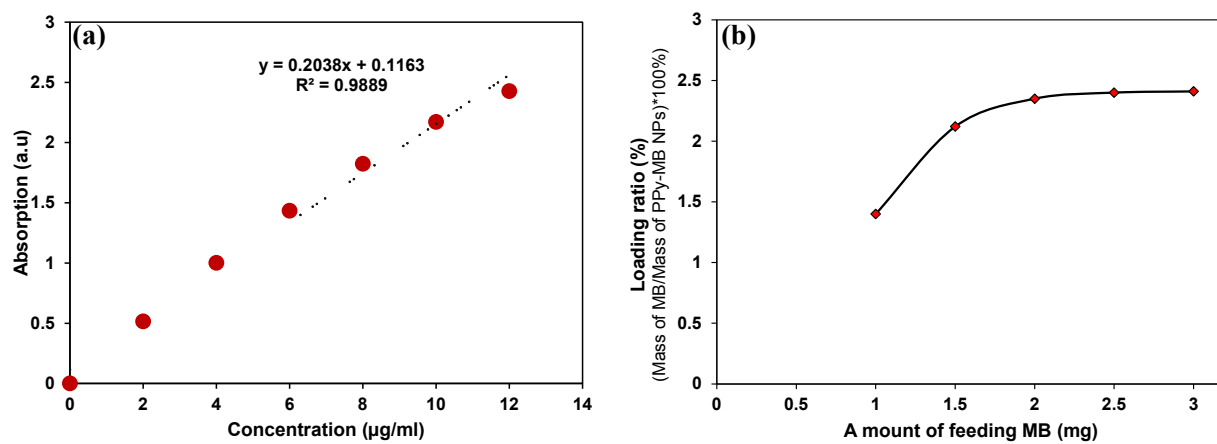

**Figure S1:** (a) The standard curve of MB, and (b) The plot of the loading amount of MB on the PPY NPs.

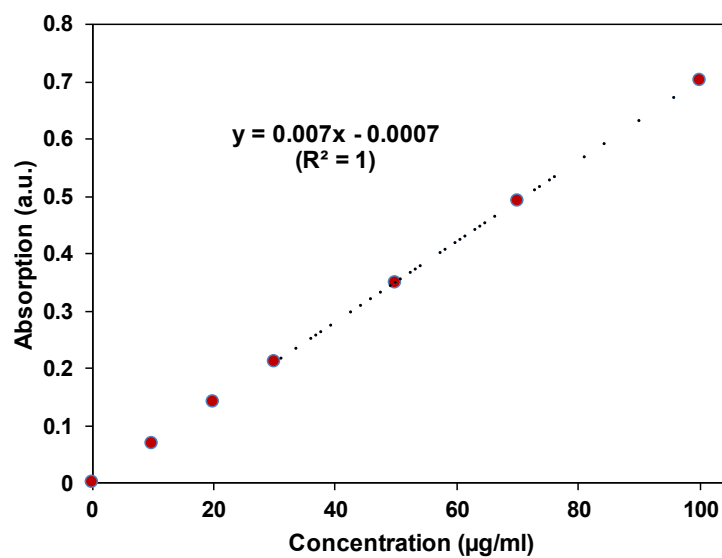

**Figure S2:** The standard curve of PPY-MB NPs (based on 808 nm peak absorption).

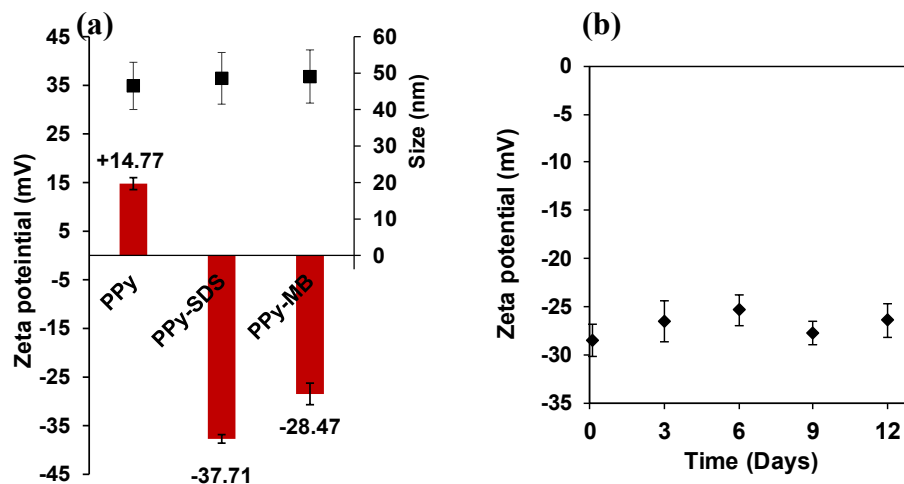

**Figure S3:** (a) Zeta potential of PPy, PPy-SDS and PPy-MB NPs, (b) Zeta potentials are recorded for PPy-MB NPs over 12 days.

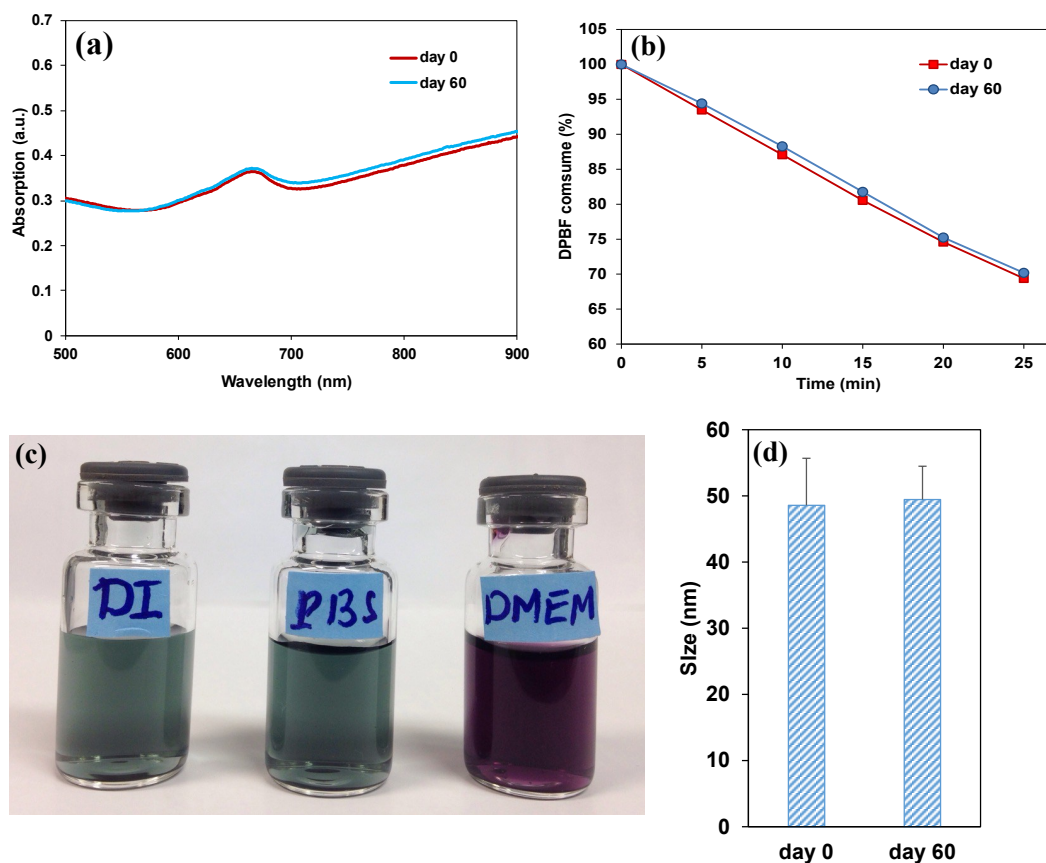

**Figure S4:** (a) The UV-Vis-NIR absorption spectra of PPy-MB NPs at the first day and the 60<sup>th</sup> day of long-term storage test. (b) Decay profiles of the DPBF consumed in the presence of PPy-MB NPs (at 50  $\mu\text{g/ml}$  concentration) with 808 nm laser at 0.5 W/cm<sup>2</sup> at the first day and the 60<sup>th</sup> day. (c) The photos of PPy-MB NPs in different media after 20 days storage. (d) The particles size of PPy-MB NPs at the first day and the 60<sup>th</sup> day of long-term storage test.

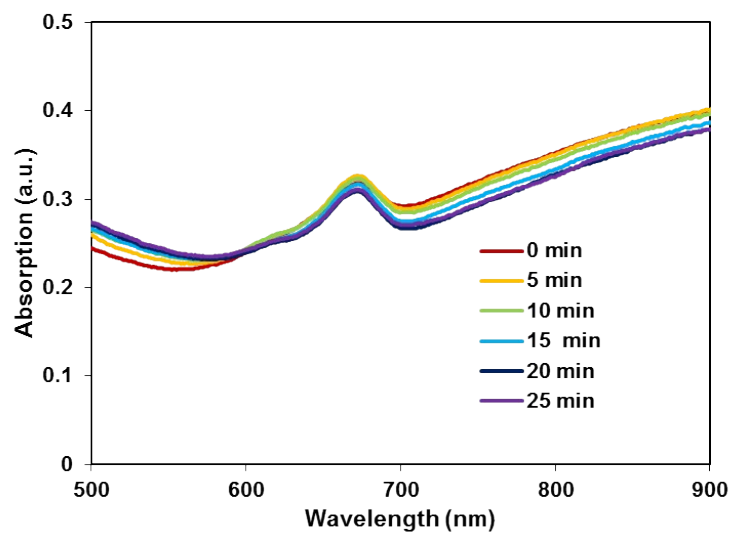

**Figure S5:** The UV-Vis-NIR absorption spectra of PPy-MB NPs with DPBF (diluted in DMSO) under 808 nm laser during 0-25 minutes.

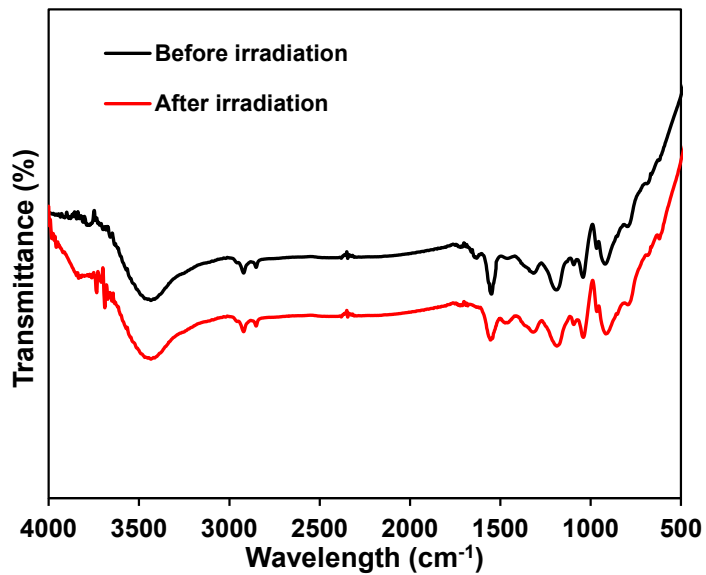

**Figure S6:** FTIR of PPy-MB NPs before and after 808 nm laser ( $1 \text{ W/cm}^2$ ) irradiation for 30 minutes.

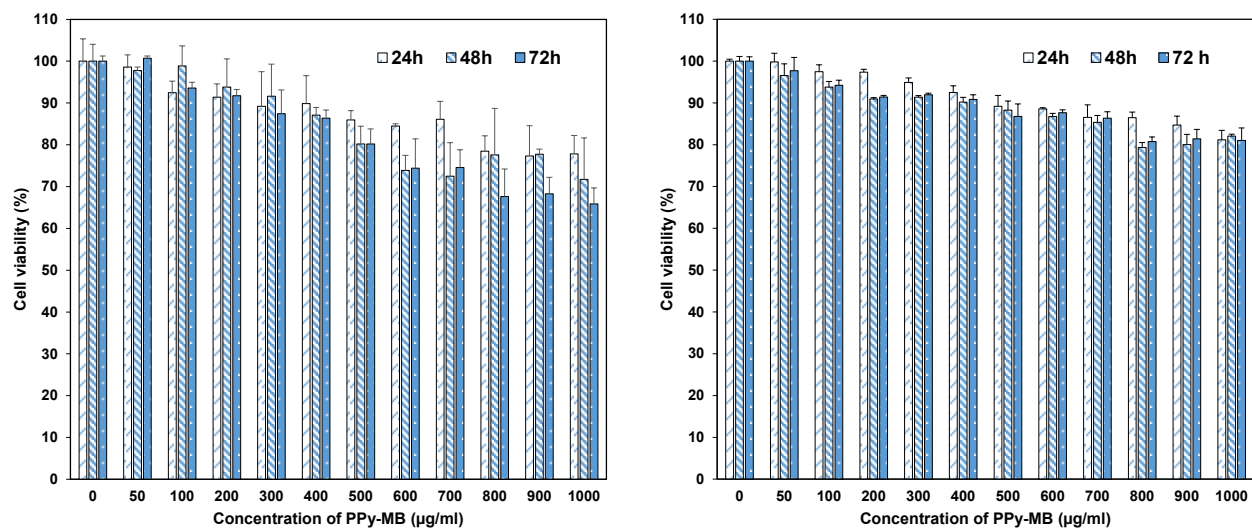

**Figure S7:** The cell viability (with MTT assay) of (a) MDA-MB-231 cells and (b) NHDF-Neo cells incubated with PPy-MB NPs with different concentrations for 24, 48, and 72 hours.

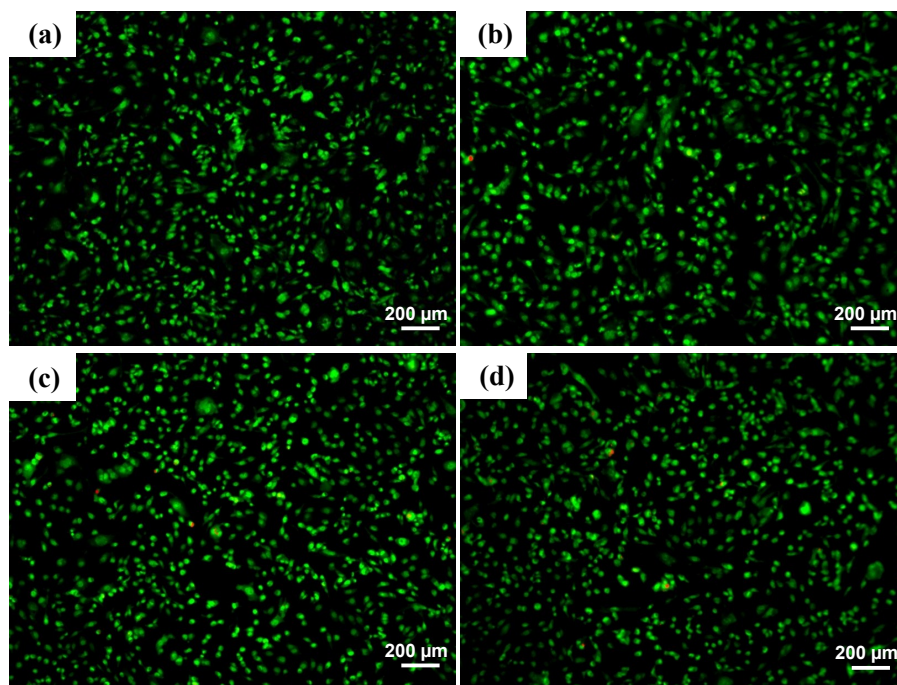

**Figure S8:** Fluorescence images of MDA-MB-231 cells incubated with PPy-MB NPs with different concentrations for 24 hours. (a) Control without nanoparticles (b) Incubated with 50 µg/ml PPy-MB NPs, (c) Incubated with 100 µg/ml PPy-MB NPs, and (d) Incubated with 200 µg/ml PPy-MB NPs.

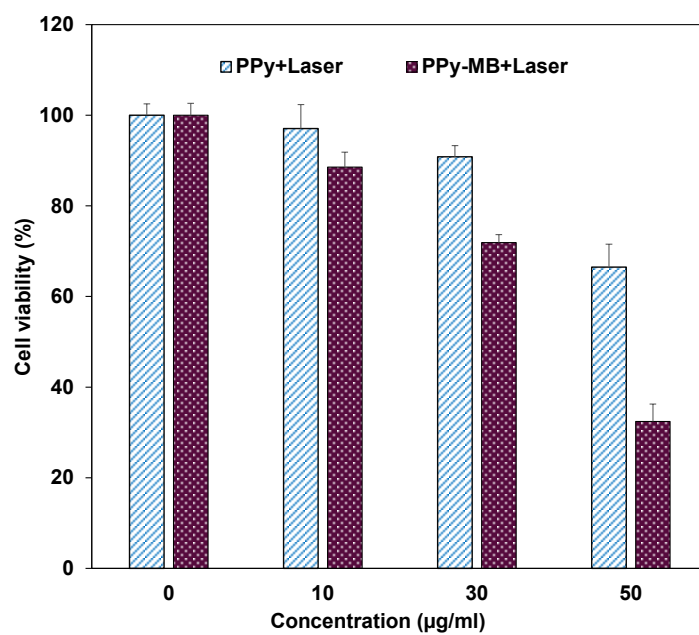

**Figure S9:** The cell viability (with MTT assay) of MDA-MB-231 cells treated with PPy NPs, and PPy-MB NPs at various concentrations. The cells were irradiated under 808 nm laser for 6 minutes at 0.5 W/cm<sup>2</sup>.

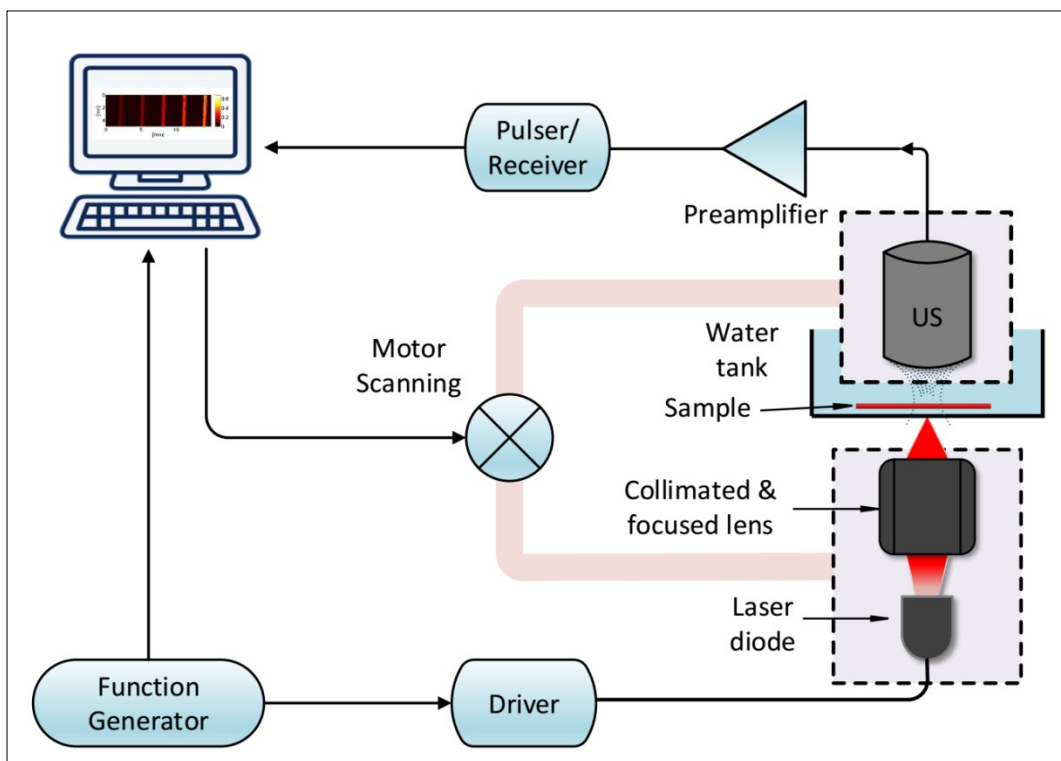

**Figure S10:** Experimental setup of photoacoustic microscopy (PAM) laser diode on PPy-MB NPs injected samples.

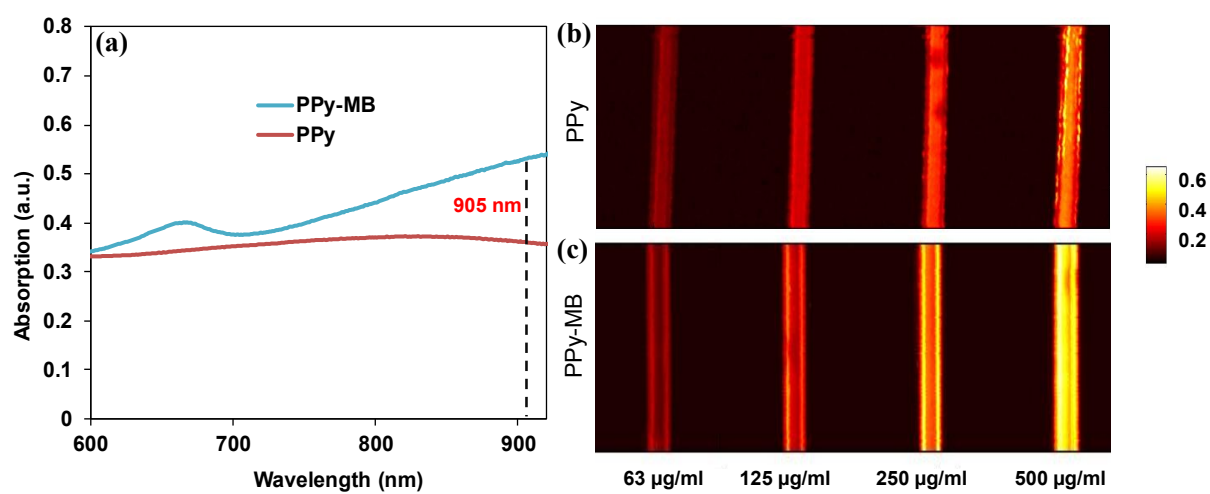

**Figure S11:** (a) The UV-Vis absorption of PPy and PPy-MB NPs (the amount of PPy is 50  $\mu\text{g/mL}$ ), (b) and (c) PA responses of PPy NPs and PPy-MB NPs at various concentrations.

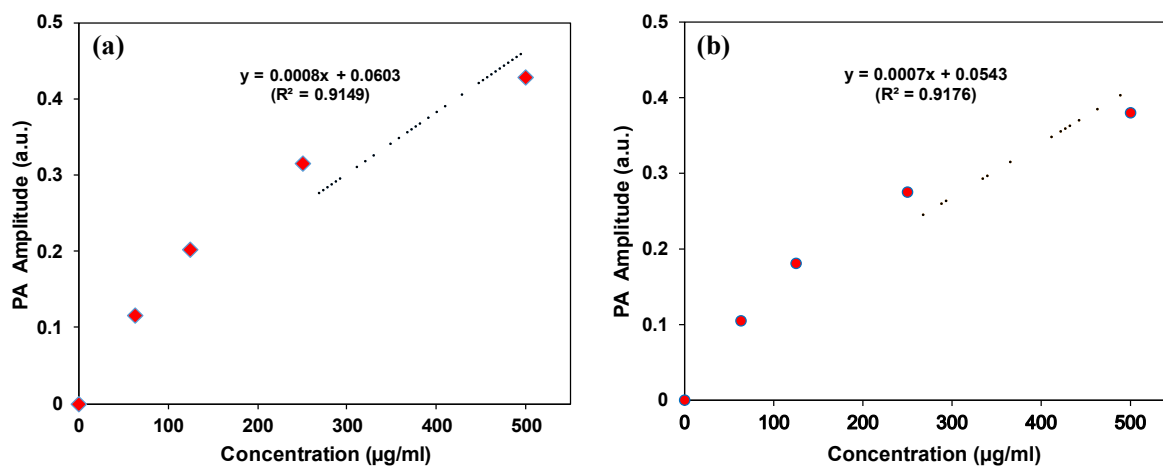

**Figure S12:** The standard curve of PA amplitude using (a) PPy NPs and (b) PPy-MB NPs.
